# Supplementary material
Source: Research Square preprint supplement (doi:10.21203/rs.3.rs-9286426/v1)
Supplement: Supplementary file 1 [file 38c3bf17843400bfe77aaf52.docx]

**Supportive Care in Cancer**

Identification of Distinct Clinical Phenotypes in Chemotherapy-Induced Neutropenic Fever Patients and Their Associated Predictors of Mortality

Ye Jun Won, B.S.1, Kiwan Joung, M.S.1, Hansol Chang, M.D, PhD1,2, Sejin Heo, M.D, PhD1,2, Won Chul Cha, M.D, PhD1,2, Minha Kim, M.D, PhD1,2, Taerim Kim, M.D, PhD1,2,4,*, Ju-Hyun Kim, M.D, PhD3,*

** Co-corresponding authors*

¹ Department of Digital Health, Samsung Advanced Institute for Health Sciences and Technology (SAIHST), Sungkyunkwan University, Seoul, Republic of Korea

² Department of Emergency Medicine, Samsung Medical Center, Sungkyunkwan University School of Medicine, Seoul, Republic of Korea

³ Department of Obstetrics and Gynecology, University of Ulsan College of Medicine, Asan Medical Center, Seoul, Republic of Korea

⁴ ETOILE Inc., Seoul, Republic of Korea

**Corresponding Authors**

**Taerim Kim, MD, PhD**

ETOILE Inc.; Department of Emergency Medicine, Samsung Medical Center, Sungkyunkwan University School of Medicine, 115 Irwon-ro Gangnam-gu, Seoul 06355, South Korea.

E-mail: taerim.j.kim@gmail.com | Telephone: taerim.j.kim@gmail.com

**Ju-Hyun Kim, MD, PhD**

Department of Obstetrics and Gynecology, University of Ulsan College of Medicine, Asan Medical Center, 88, Olympic-ro 43-gil, Songpa-gu, Seoul 05505, Republic of Korea.

E-mail: smilekako@naver.com | Telephone: 82 10-9668-6227

# Supplementary Table 1. Treatment Regimen Categories and Examples

Combination regimens were included as a distinct class if an identical pharmacological regimen was observed in more than 50 cases. Cases for which treatment information was insufficient to enable pharmacological classification were categorized as ‘Others’; this group largely comprises records in which the chemotherapy regimen was documented only as ‘unspecified chemotherapy’ or equivalent non-informative entries. Representative regimen examples for each class are provided in the table below.

| **Category** | **Regimens Examples** |
| --- | --- |
| Microtubule Inhibitor + DNA Crosslinking Agent | Docetaxel/Carboplatin, CVD |
| Alkylating Agent + Topoisomerase II Inhibitor + Microtubule Inhibitor | Hyper CVAD / ABVD / CHOP / EPOCH |
| DNA Crosslinking Agent + Topoisomerase I Inhibitor | Topotecan + Cyclophosphamide / Irinotecan + Cisplatin |
| DNA Crosslinking Agent + Antimetabolite | Gemcitabine + Carboplatin / CMF |
| Antimetabolite + Topoisomerase I Inhibitor | FOLFIRI (5FU + Irinotecan) |
| Topoisomerase I Inhibitor Monotherapy | Irinotecan |
| Microtubule Inhibitor Monotherapy | Paclitaxel / Docetaxel |
| DNA Crosslinking Agent + Topoisomerase II Inhibitor | MAID / DCEP |
| Microtubule Inhibitor + Antimetabolite | Gemcitabine + Docetaxel |
| Antimetabolite Monotherapy | Decitabine, 5-FU |
| Microtubule Inhibitor + DNA Crosslinking Agent + Antimetabolite | CMV / R-MVP |
| Targeted Inhibitor Molecules | Gefitinib / Bortezomib |
| Monoclonal Antibodies | Glofitamab / Denosumab / Bevacizumab |
| Antimetabolite + Topoisomerase II Inhibitor | HiDAC / Idarubicin |

# Supplementary Table 2. Distribution of cancer types by organ across treatment-based clusters.

A total of 5,150 cases were assigned to four clusters based on their chemotherapy regimens. Each cluster exhibited a distinct cancer-type composition. Cluster 1 (n = 2,084) was predominantly composed of cases with unspecified solid cancers, mostly carcinoma: unspecified carcinoma accounted for 71.8% (n = 1,496) and unspecified adenocarcinoma for a further 7.6% (n = 158), together comprising 79.4% of all cases in this cluster. These cases lacked sufficient diagnostic information to permit histological classification and therefore could not be assigned to a specific cancer-type category. Cluster 2 (n = 608) was most strongly represented by hematological malignancies, with leukemia (30.8%), lymphoma (12.7%), and connective tissue tumors (11.8%) together accounting for the majority of cases. Brain tumors (15.1%) were also notably prevalent. Cluster 3 (n = 1,232) was dominated by breast cancer, which constituted 54.5% of all cases (n = 671) — the second largest specified cancer-type proportion observed across any cluster, followed by lymphoma composition in Cluster 4. The remaining cases included unspecified carcinoma (30.4%) and unspecified adenocarcinoma (3.7%), for which no further diagnostic detail was available. Cluster 4 (n = 1,226) was characterized by lymphoid and plasma cell malignancies: lymphoma comprised 76.4% (n = 937) and multiple myeloma 11.8% (n = 145) of cases in this cluster.

| **Cancer Type** | **Cluster 1** | **Cluster 2** | **Cluster 3** | **Cluster 4** |
| --- | --- | --- | --- | --- |
| Brain | 56 | **92** | 7 | 2 |
| Breast | 150 | 6 | **671** | 0 |
| Connective (excl. blood) | 13 | 72 | 43 | **125** |
| Kidney | **25** | 1 | 1 | 0 |
| Leukaemia | 0 | **187** | 0 | 8 |
| Lung | **3** | 0 | 2 | 0 |
| Lymphoma | 3 | 77 | 0 | **937** |
| Multiple Myeloma | 0 | 0 | 0 | **145** |
| Others | **173** | 154 | 84 | 9 |
| Ovarian | 0 | **4** | 0 | 0 |
| Pancreatic | 0 | 0 | **1** | 0 |
| Skin | 1 | **7** | 3 | 0 |
| Testicular | **6** | 0 | 0 | 0 |
| Unspecified Adenocarcinoma | **158** | 0 | 45 | 0 |
| Unspecified Carcinoma | **1496** | 8 | 375 | 0 |
