# Supplementary material
Source: Research Square preprint supplement (doi:10.21203/rs.3.rs-9286426/v1)
Supplement: Supplementary file 2 [file bc901ea00accd120c7c1d450.docx]

**Supportive Care in Cancer**

Identification of Distinct Clinical Phenotypes in Chemotherapy-Induced Neutropenic Fever Patients and Their Associated Predictors of Mortality

Ye Jun Won, B.S.1, Kiwan Joung, M.S.1, Hansol Chang, M.D, PhD1,2, Sejin Heo, M.D, PhD1,2, Won Chul Cha, M.D, PhD1,2, Minha Kim, M.D, PhD1,2, Taerim Kim, M.D, PhD1,2,4,*, Ju-Hyun Kim, M.D, PhD3,*

** Co-corresponding authors*

¹ Department of Digital Health, Samsung Advanced Institute for Health Sciences and Technology (SAIHST), Sungkyunkwan University, Seoul, Republic of Korea

² Department of Emergency Medicine, Samsung Medical Center, Sungkyunkwan University School of Medicine, Seoul, Republic of Korea

³ Department of Obstetrics and Gynecology, University of Ulsan College of Medicine, Asan Medical Center, Seoul, Republic of Korea

⁴ ETOILE Inc., Seoul, Republic of Korea

**Corresponding Authors**

**Taerim Kim, MD, PhD**

ETOILE Inc.; Department of Emergency Medicine, Samsung Medical Center, Sungkyunkwan University School of Medicine, 115 Irwon-ro Gangnam-gu, Seoul 06355, South Korea.

E-mail: taerim.j.kim@gmail.com | Telephone: taerim.j.kim@gmail.com

**Ju-Hyun Kim, MD, PhD**

Department of Obstetrics and Gynecology, University of Ulsan College of Medicine, Asan Medical Center, 88, Olympic-ro 43-gil, Songpa-gu, Seoul 05505, Republic of Korea.

E-mail: smilekako@naver.com | Telephone: 82 10-9668-6227

Supplementary Table 3. Multivariable Cox proportional hazards regression analysis for all-cause mortality across latent class clusters in patients with neutropenic fever.

Outcome: All-cause mortality · Reference categories: Target Inhibitors (chemotherapy) / Mild neutropenia / Fever 38–39°C / Hypertension / High pulse rate / High respiratory rate

Hazard ratios (HRs) and 95% confidence intervals (CIs) were estimated using multivariable Cox proportional hazards regression models fitted separately within each latent class cluster (Clusters 1– 4) and in the total pooled cohort (N = 5,150). Four latent class clusters were identified from the neutropenic fever cohort via latent class analysis: Cluster 1 (n = 2,084), predominantly elderly patients (median age 66) with solid carcinoma, highest 30-day mortality (13.9%); Cluster 2 (n = 608), younger patients (median age 48) with hematologic malignancies (leukemia 36.8%), antimetabolite-predominant regimens, best median survival (494 days); Cluster 3 (n = 1,232), nearly all female (99.8%) patients with gynecologic or solid tumors, youngest median age (49), best overall median survival (897 days); Cluster 4 (n = 1,226), patients with lymphoma (82.0%) or multiple myeloma (11.8%), median age 61, median survival 274 days.

Covariates included age, sex, neutropenia severity, body temperature category, blood pressure category, pulse rate category, respiratory rate category, thrombocytopenia, pancytopenia, albumin, C-reactive protein (CRP), and chemotherapy regimen. Cells reported as NA indicate non-estimable coefficients resulting from zero events, complete separation, or absence of patients with the given exposure within the respective cluster. Extremely large or near-zero HR estimates with wide or infinite confidence intervals similarly reflect complete or quasi-complete separation and should be interpreted with caution

| Variable | HR | Std. Error | Statistic | P-value | 95% CI |  |
| --- | --- | --- | --- | --- | --- | --- |
| Patient Characteristics | | | | | | |
| Age | 1.01 | 0.00424 | 1.28 | 0.199 | 0.997 – 1.01 |  |
| Haematological Parameters | | | | | | |
| Neutropenia (Intermediate) | 1.16 | 0.114 | 1.31 | 0.191 | 0.929 – 1.45 |  |
| Neutropenia (Severe) | 0.806 | 0.119 | -1.82 | 0.069 | 0.639 – 1.02 |  |
| Vital Signs — Body Temperature | | | | | | |
| Body Temperature (High Fever) | 0.896 | 0.188 | -0.586 | 0.558 | 0.62 – 1.29 |  |
| Body Temperature (Normal) | 1.41 | 0.123 | 2.77 | 0.00554 | 1.11 – 1.79 | * |
| Body Temperature (Subnormal) | 2.18 | 0.159 | 4.9 | <0.001 | 1.6 – 2.97 | * |
| Haematological Parameters (cont.) | | | | | | |
| Thrombocytopenia | 1.48 | 0.125 | 3.15 | 0.00164 | 1.16 – 1.9 | * |
| Laboratory Values | | | | | | |
| Albumin | 0.312 | 0.0882 | -13.2 | <0.001 | 0.262 – 0.37 | * |
| CRP | 1.02 | 0.00442 | 5.01 | <0.001 | 1.01 – 1.03 | * |
| Vital Signs — Blood Pressure | | | | | | |
| Blood Pressure (Hypotension) | 0.941 | 0.119 | -0.517 | 0.605 | 0.746 – 1.19 |  |
| Blood Pressure (Normal) | 0.776 | 0.114 | -2.23 | 0.0259 | 0.621 – 0.97 | * |
| Vital Signs — Pulse Rate | | | | | | |
| Pulse Rate (Low) | 1.08 | 0.586 | 0.135 | 0.893 | 0.343 – 3.41 |  |
| Pulse Rate (Normal) | 0.637 | 0.113 | -3.98 | <0.001 | 0.51 – 0.796 | * |
| Vital Signs — Respiratory Rate | | | | | | |

| Variable | HR | Std. Error | Statistic | P-value | 95% CI |  |
| --- | --- | --- | --- | --- | --- | --- |
| Respiratory Rate (Low) | 8.00e-6 | 1090 | -0.0107 | 0.991 | 0 – ∞ |  |
| Respiratory Rate (Normal) | 0.551 | 0.104 | -5.73 | <0.001 | 0.45 – 0.676 | * |
| Haematological Parameters (cont.) | | | | | | |
| Pancytopenia | 0.906 | 0.109 | -0.909 | 0.363 | 0.732 – 1.12 |  |
| Sex (Male) | 1.13 | 0.101 | 1.24 | 0.214 | 0.93 – 1.38 |  |
| Chemotherapy Regimen | | | | | | |
| Alkylating Agent + Topoisomerase II Inhibitor + Microtubule Inhibitor | 0.314 | 0.337 | -3.44 | <0.001 | 0.162 – 0.607 | * |
| Antimetabolite Monotherapy | 0.865 | 0.257 | -0.563 | 0.573 | 0.523 – 1.43 |  |
| Antimetabolite + Topoisomerase II Inhibitor | 0.829 | 0.443 | -0.422 | 0.673 | 0.348 – 1.98 |  |
| DNA Crosslinking Agent + Topoisomerase I Inhibitor | 0.94 | 0.318 | -0.196 | 0.845 | 0.504 – 1.75 |  |
| DNA Crosslinking Agent + Topoisomerase II Inhibitor | 0.64 | 0.255 | -1.75 | 0.0808 | 0.388 – 1.06 |  |
| FOLFIRI Regimen | 1.02 | 0.298 | 0.0737 | 0.941 | 0.57 – 1.83 |  |
| Monoclonal Antibodies | 0.912 | 0.262 | -0.35 | 0.726 | 0.546 – 1.52 |  |
| Microtubule Inhibitor + Antimetabolite | 0.154 | 0.738 | -2.54 | 0.0112 | 0.0361 – 0.653 | * |
| Microtubule Inhibitor + DNA Crosslinking Agent + Antimetabolite | 0.744 | 0.411 | -0.719 | 0.472 | 0.333 – 1.67 |  |
| Microtubule Inhibitor Monotherapy | 0.819 | 0.253 | -0.791 | 0.429 | 0.499 – 1.34 |  |
| Other Unclassified Regimen | 0.783 | 0.25 | -0.982 | 0.326 | 0.48 – 1.28 |  |
| Platinum + Antimetabolite | 0.748 | 0.281 | -1.03 | 0.301 | 0.431 – 1.3 |  |
| Taxane + Platinum | 0.766 | 0.237 | -1.12 | 0.261 | 0.482 – 1.22 |  |
| Topoisomerase I Inhibitor Monotherapy | 0.692 | 0.358 | -1.03 | 0.303 | 0.343 – 1.4 |  |

Cluster 1

| Variable | HR | Std. Error | Statistic | P-value | 95% CI |  |
| --- | --- | --- | --- | --- | --- | --- |
| Patient Characteristics | | | | | | |
| Age | 1 | 0.00687 | 0.589 | 0.556 | 0.991 – 1.02 |  |
| Haematological Parameters | | | | | | |
| Neutropenia (Intermediate) | 1.28 | 0.161 | 1.53 | 0.125 | 0.934 – 1.75 |  |
| Neutropenia (Severe) | 1.13 | 0.165 | 0.738 | 0.46 | 0.818 – 1.56 |  |
| Vital Signs — Body Temperature | | | | | | |
| Body Temperature (High Fever) | 0.927 | 0.287 | -0.265 | 0.791 | 0.528 – 1.63 |  |

| Variable | HR | Std. Error | Statistic | P-value | 95% CI |  |
| --- | --- | --- | --- | --- | --- | --- |
| Body Temperature (Normal) | 1.41 | 0.176 | 1.96 | 0.05 | 1 – 1.99 |  |
| Body Temperature (Subnormal) | 2.15 | 0.217 | 3.54 | <0.001 | 1.41 – 3.3 | * |
| Haematological Parameters (cont.) | | | | | | |
| Thrombocytopenia | 1.28 | 0.166 | 1.51 | 0.131 | 0.928 – 1.78 |  |
| Laboratory Values | | | | | | |
| Albumin | 0.312 | 0.131 | -8.93 | <0.001 | 0.241 – 0.402 | * |
| CRP | 1.03 | 0.00603 | 4.28 | <0.001 | 1.01 – 1.04 | * |
| Vital Signs — Blood Pressure | | | | | | |
| Blood Pressure (Hypotension) | 0.818 | 0.167 | -1.21 | 0.228 | 0.59 – 1.13 |  |
| Blood Pressure (Normal) | 0.727 | 0.157 | -2.03 | 0.0426 | 0.535 – 0.989 | * |
| Vital Signs — Pulse Rate | | | | | | |
| Pulse Rate (Low) | 1.35 | 0.731 | 0.415 | 0.678 | 0.323 – 5.68 |  |
| Pulse Rate (Normal) | 0.685 | 0.15 | -2.52 | 0.0117 | 0.51 – 0.919 | * |
| Vital Signs — Respiratory Rate | | | | | | |
| Respiratory Rate (Low) | 4.00e-6 | 1440 | -0.00847 | 0.993 | 0 – ∞ |  |
| Respiratory Rate (Normal) | 0.49 | 0.149 | -4.8 | <0.001 | 0.366 – 0.656 | * |
| Haematological Parameters (cont.) | | | | | | |
| Pancytopenia | 1.23 | 0.157 | 1.33 | 0.184 | 0.906 – 1.67 |  |
| Sex (Male) | 1.28 | 0.177 | 1.38 | 0.167 | 0.903 – 1.81 |  |
| Chemotherapy Regimen | | | | | | |
| Alkylating Agent + Topoisomerase II Inhibitor + Microtubule Inhibitor | 0.564 | 0.535 | -1.07 | 0.285 | 0.198 – 1.61 |  |
| Antimetabolite Monotherapy | 0.537 | 0.44 | -1.42 | 0.157 | 0.227 – 1.27 |  |
| Antimetabolite + Topoisomerase II Inhibitor | — | — | — | — | — |  |
| DNA Crosslinking Agent + Topoisomerase I Inhibitor | 0.525 | 0.458 | -1.41 | 0.159 | 0.214 – 1.29 |  |
| DNA Crosslinking Agent + Topoisomerase II Inhibitor | 0.521 | 0.439 | -1.49 | 0.137 | 0.22 – 1.23 |  |
| FOLFIRI Regimen | 0.56 | 0.471 | -1.23 | 0.218 | 0.222 – 1.41 |  |
| Monoclonal Antibodies | 0.521 | 0.465 | -1.4 | 0.161 | 0.21 – 1.3 |  |
| Microtubule Inhibitor + Antimetabolite | 0.0706 | 1.08 | -2.46 | 0.0138 | 0.00856 – 0.582 | * |
| Microtubule Inhibitor + DNA Crosslinking Agent + Antimetabolite | 0.368 | 0.819 | -1.22 | 0.222 | 0.074 – 1.83 |  |
| Microtubule Inhibitor Monotherapy | 0.543 | 0.422 | -1.45 | 0.147 | 0.238 – 1.24 |  |
| Other Unclassified Regimen | 0.509 | 0.461 | -1.46 | 0.143 | 0.206 – 1.26 |  |
| Platinum + Antimetabolite | 0.469 | 0.435 | -1.74 | 0.0823 | 0.2 – 1.1 |  |

| Variable | HR | Std. Error | Statistic | P-value | 95% CI |  |
| --- | --- | --- | --- | --- | --- | --- |
| Taxane + Platinum | 0.434 | 0.415 | -2.01 | 0.0445 | 0.192 – 0.98 | * |
| Topoisomerase I Inhibitor Monotherapy | 0.41 | 0.49 | -1.82 | 0.069 | 0.157 – 1.07 |  |

Cluster 2

| Variable | HR | Std. Error | Statistic | P-value | 95% CI |  |
| --- | --- | --- | --- | --- | --- | --- |
| Patient Characteristics | | | | | | |
| Age | 1.04 | 0.0151 | 2.9 | 0.00371 | 1.01 – 1.08 | * |
| Haematological Parameters | | | | | | |
| Neutropenia (Intermediate) | 0.675 | 0.441 | -0.89 | 0.374 | 0.284 – 1.6 |  |
| Neutropenia (Severe) | 0.684 | 0.502 | -0.757 | 0.449 | 0.256 – 1.83 |  |
| Vital Signs — Body Temperature | | | | | | |
| Body Temperature (High Fever) | 0.971 | 0.54 | -0.0542 | 0.957 | 0.337 – 2.8 |  |
| Body Temperature (Normal) | 0.871 | 0.426 | -0.325 | 0.745 | 0.378 – 2.01 |  |
| Body Temperature (Subnormal) | 5.83 | 0.692 | 2.55 | 0.0109 | 1.5 – 22.6 | * |
| Haematological Parameters (cont.) | | | | | | |
| Thrombocytopenia | 1.23e+8 | 4630 | 0.00402 | 0.997 | 0 – ∞ |  |
| Laboratory Values | | | | | | |
| Albumin | 0.455 | 0.339 | -2.32 | 0.0201 | 0.234 – 0.884 | * |
| CRP | 1.02 | 0.0216 | 1.12 | 0.265 | 0.982 – 1.07 |  |
| Vital Signs — Blood Pressure | | | | | | |
| Blood Pressure (Hypotension) | 0.745 | 0.468 | -0.63 | 0.529 | 0.298 – 1.86 |  |
| Blood Pressure (Normal) | 0.854 | 0.453 | -0.349 | 0.727 | 0.351 – 2.08 |  |
| Vital Signs — Pulse Rate | | | | | | |
| Pulse Rate (Low) | 5.00e-9 | 3.19e+4 | -5.90e-4 | 1 | 0 – ∞ |  |
| Pulse Rate (Normal) | 0.7 | 0.422 | -0.846 | 0.398 | 0.306 – 1.6 |  |
| Respiratory Rate (Normal) | 0.783 | 0.398 | -0.614 | 0.539 | 0.359 – 1.71 |  |
| Haematological Parameters (cont.) | | | | | | |
| Pancytopenia | 0.983 | 0.391 | -0.0451 | 0.964 | 0.457 – 2.11 |  |
| Sex (Male) | 1.07 | 0.382 | 0.181 | 0.856 | 0.507 – 2.27 |  |
| Chemotherapy Regimen | | | | | | |

| Variable | HR | Std. Error | Statistic | P-value | 95% CI |  |
| --- | --- | --- | --- | --- | --- | --- |
| Alkylating Agent + Topoisomerase II Inhibitor + Microtubule Inhibitor | 6.00e-9 | 2.27e+4 | -8.30e-4 | 0.999 | 0 – ∞ |  |
| Antimetabolite Monotherapy | 0.613 | 0.784 | -0.625 | 0.532 | 0.132 – 2.85 |  |
| Antimetabolite + Topoisomerase II Inhibitor | 0.54 | 1.03 | -0.598 | 0.55 | 0.0714 – 4.08 |  |
| DNA Crosslinking Agent + Topoisomerase I Inhibitor | 8.13 | 1.31 | 1.6 | 0.109 | 0.627 – 105 |  |
| DNA Crosslinking Agent + Topoisomerase II Inhibitor | 0.476 | 1.01 | -0.738 | 0.461 | 0.0662 – 3.42 |  |
| FOLFIRI Regimen | — | — | — | — | — |  |
| Monoclonal Antibodies | — | — | — | — | — |  |
| Microtubule Inhibitor + Antimetabolite | 1.00e-8 | 8220 | -0.00218 | 0.998 | 0 – ∞ |  |
| Microtubule Inhibitor + DNA Crosslinking Agent + Antimetabolite | — | — | — | — | — |  |
| Microtubule Inhibitor Monotherapy | — | — | — | — | — |  |
| Other Unclassified Regimen | 1.17 | 0.79 | 0.196 | 0.844 | 0.248 – 5.49 |  |
| Platinum + Antimetabolite | — | — | — | — | — |  |
| Taxane + Platinum | 0.405 | 1.28 | -0.709 | 0.479 | 0.0332 – 4.94 |  |
| Topoisomerase I Inhibitor Monotherapy | 0.11 | 5.61e+4 | -4.00e-5 | 1 | 0 – ∞ |  |

Cluster 3

| Variable | HR | Std. Error | Statistic | P-value | 95% CI |  |
| --- | --- | --- | --- | --- | --- | --- |
| Patient Characteristics | | | | | | |
| Age | 0.974 | 0.0142 | -1.87 | 0.062 | 0.947 – 1 |  |
| Haematological Parameters | | | | | | |
| Neutropenia (Intermediate) | 1.19 | 0.29 | 0.592 | 0.554 | 0.672 – 2.1 |  |
| Neutropenia (Severe) | 0.459 | 0.333 | -2.34 | 0.0195 | 0.239 – 0.882 | * |
| Vital Signs — Body Temperature | | | | | | |
| Body Temperature (High Fever) | 0.654 | 0.66 | -0.644 | 0.519 | 0.179 – 2.38 |  |
| Body Temperature (Normal) | 1.94 | 0.346 | 1.92 | 0.0553 | 0.985 – 3.83 |  |
| Body Temperature (Subnormal) | 2.67 | 0.471 | 2.08 | 0.0373 | 1.06 – 6.72 | * |
| Haematological Parameters (cont.) | | | | | | |
| Thrombocytopenia | 1.28 | 0.279 | 0.894 | 0.372 | 0.742 – 2.22 |  |
| Laboratory Values | | | | | | |
| Albumin | 0.179 | 0.227 | -7.59 | <0.001 | 0.115 – 0.279 | * |

| Variable | HR | Std. Error | Statistic | P-value | 95% CI |  |
| --- | --- | --- | --- | --- | --- | --- |
| CRP | 1.01 | 0.0115 | 1.27 | 0.205 | 0.992 – 1.04 |  |
| Vital Signs — Blood Pressure | | | | | | |
| Blood Pressure (Hypotension) | 1.32 | 0.331 | 0.846 | 0.397 | 0.692 – 2.53 |  |
| Blood Pressure (Normal) | 0.807 | 0.294 | -0.73 | 0.466 | 0.454 – 1.43 |  |
| Vital Signs — Pulse Rate | | | | | | |
| Pulse Rate (Low) | 2.00e-7 | 7860 | -0.00192 | 0.998 | 0 – ∞ |  |
| Pulse Rate (Normal) | 0.748 | 0.288 | -1.01 | 0.313 | 0.425 – 1.32 |  |
| Respiratory Rate (Normal) | 0.545 | 0.255 | -2.38 | 0.0171 | 0.331 – 0.898 | * |
| Haematological Parameters (cont.) | | | | | | |
| Pancytopenia | 0.462 | 0.372 | -2.07 | 0.038 | 0.223 – 0.958 | * |
| Sex (Male) | 2.00e-8 | 8410 | -0.00209 | 0.998 | 0 – ∞ |  |
| Chemotherapy Regimen | | | | | | |
| Alkylating Agent + Topoisomerase II Inhibitor + Microtubule Inhibitor | 1.00e-7 | 2460 | -0.00637 | 0.995 | 0 – ∞ |  |
| Antimetabolite Monotherapy | 1.5 | 0.619 | 0.656 | 0.512 | 0.446 – 5.05 |  |
| Antimetabolite + Topoisomerase II Inhibitor | 6.00e-8 | 2.90e+4 | -5.70e-4 | 1 | 0 – ∞ |  |
| DNA Crosslinking Agent + Topoisomerase I Inhibitor | — | — | — | — | — |  |
| DNA Crosslinking Agent + Topoisomerase II Inhibitor | 0.958 | 0.532 | -0.0799 | 0.936 | 0.338 – 2.72 |  |
| FOLFIRI Regimen | 1.68 | 0.568 | 0.917 | 0.359 | 0.553 – 5.13 |  |
| Monoclonal Antibodies | 1.35 | 0.742 | 0.406 | 0.685 | 0.315 – 5.79 |  |
| Microtubule Inhibitor + Antimetabolite | 0.309 | 1.09 | -1.08 | 0.28 | 0.0366 – 2.6 |  |
| Microtubule Inhibitor + DNA Crosslinking Agent + Antimetabolite | — | — | — | — | — |  |
| Microtubule Inhibitor Monotherapy | 0.913 | 0.528 | -0.173 | 0.863 | 0.324 – 2.57 |  |
| Other Unclassified Regimen | 0.845 | 0.669 | -0.251 | 0.801 | 0.228 – 3.14 |  |
| Platinum + Antimetabolite | 1.19 | 0.721 | 0.24 | 0.811 | 0.289 – 4.88 |  |
| Taxane + Platinum | 1.5 | 0.482 | 0.839 | 0.402 | 0.582 – 3.86 |  |
| Topoisomerase I Inhibitor Monotherapy | 0.825 | 1.15 | -0.167 | 0.868 | 0.086 – 7.91 |  |

Cluster 4

| Variable | HR | Std. Error | Statistic | P-value | 95% CI |  |
| --- | --- | --- | --- | --- | --- | --- |
| Patient Characteristics | | | | | | |

| Variable | HR | Std. Error | Statistic | P-value | 95% CI |  |
| --- | --- | --- | --- | --- | --- | --- |
| Age | 1 | 0.00878 | 0.323 | 0.746 | 0.986 – 1.02 |  |
| Haematological Parameters | | | | | | |
| Neutropenia (Intermediate) | 1.31 | 0.243 | 1.13 | 0.26 | 0.817 – 2.12 |  |
| Neutropenia (Severe) | 0.672 | 0.274 | -1.45 | 0.146 | 0.393 – 1.15 |  |
| Vital Signs — Body Temperature | | | | | | |
| Body Temperature (High Fever) | 1 | 0.327 | 0.00354 | 0.997 | 0.527 – 1.9 |  |
| Body Temperature (Normal) | 1.37 | 0.251 | 1.27 | 0.205 | 0.841 – 2.25 |  |
| Body Temperature (Subnormal) | 1.44 | 0.361 | 1.01 | 0.31 | 0.711 – 2.93 |  |
| Haematological Parameters (cont.) | | | | | | |
| Thrombocytopenia | 2.45 | 0.411 | 2.18 | 0.029 | 1.1 – 5.49 | * |
| Laboratory Values | | | | | | |
| Albumin | 0.386 | 0.192 | -4.96 | <0.001 | 0.265 – 0.562 | * |
| CRP | 1.01 | 0.011 | 1.27 | 0.205 | 0.992 – 1.04 |  |
| Vital Signs — Blood Pressure | | | | | | |
| Blood Pressure (Hypotension) | 1.07 | 0.25 | 0.285 | 0.776 | 0.658 – 1.75 |  |
| Blood Pressure (Normal) | 0.889 | 0.242 | -0.487 | 0.626 | 0.553 – 1.43 |  |
| Vital Signs — Pulse Rate | | | | | | |
| Pulse Rate (Low) | 0.962 | 1.04 | -0.0377 | 0.97 | 0.126 – 7.34 |  |
| Pulse Rate (Normal) | 0.434 | 0.271 | -3.07 | 0.00212 | 0.255 – 0.739 | * |
| Respiratory Rate (Normal) | 0.692 | 0.219 | -1.68 | 0.092 | 0.451 – 1.06 |  |
| Haematological Parameters (cont.) | | | | | | |
| Pancytopenia | 0.704 | 0.215 | -1.63 | 0.104 | 0.462 – 1.07 |  |
| Sex (Male) | 1.12 | 0.209 | 0.531 | 0.595 | 0.742 – 1.68 |  |
| Chemotherapy Regimen | | | | | | |
| Alkylating Agent + Topoisomerase II Inhibitor + Microtubule Inhibitor | 0.217 | 0.553 | -2.76 | 0.00575 | 0.0733 – 0.642 | * |
| Antimetabolite Monotherapy | 1.07 | 0.644 | 0.0998 | 0.92 | 0.302 – 3.77 |  |
| Antimetabolite + Topoisomerase II Inhibitor | 1.89 | 0.647 | 0.986 | 0.324 | 0.533 – 6.72 |  |
| DNA Crosslinking Agent + Topoisomerase I Inhibitor | — | — | — | — | — |  |
| DNA Crosslinking Agent + Topoisomerase II Inhibitor | 0.535 | 0.514 | -1.22 | 0.224 | 0.195 – 1.47 |  |
| FOLFIRI Regimen | — | — | — | — | — |  |
| Monoclonal Antibodies | 1.2 | 0.444 | 0.411 | 0.681 | 0.502 – 2.87 |  |
| Microtubule Inhibitor + Antimetabolite | — | — | — | — | — |  |

| Variable | HR | Std. Error | Statistic | P-value | 95% CI |  |
| --- | --- | --- | --- | --- | --- | --- |
| Microtubule Inhibitor + DNA Crosslinking Agent + Antimetabolite | 0.967 | 0.568 | -0.0593 | 0.953 | 0.317 – 2.95 |  |
| Microtubule Inhibitor Monotherapy | — | — | — | — | — |  |
| Other Unclassified Regimen | 0.859 | 0.442 | -0.343 | 0.731 | 0.361 – 2.04 |  |
| Platinum + Antimetabolite | 0.938 | 0.706 | -0.091 | 0.927 | 0.235 – 3.74 |  |
| Taxane + Platinum | 0.816 | 0.461 | -0.441 | 0.659 | 0.331 – 2.01 |  |
| Topoisomerase I Inhibitor Monotherapy | — | — | — | — | — |  |

NA: not estimable (no events or complete separation). ∞: upper confidence limit not computable. Values < 0.001 or > 10,000 shown in scientific notation.
